# Supplementary material for: Design of a photocatalyst combining graphdiyne–Cu/NiCrO 3 with Cu as an interfacial charge-transfer bridge and investigation of its photocatalytic hydrogen evolution performance
Source: Royal Society of Chemistry journal article supplement (doi:10.1039/d4tc03677h), 2024-12-06
Supplement: d4tc03677h1.pdf [file d4tc03677h1.pdf]

## Supporting Information

### Design of a photocatalyst combining graphdiyne-Cu/NiCrO<sub>3</sub> with Cu as an interfacial charge transfer bridge and its photocatalytic hydrogen evolution

Lu Ding, Zhiliang Jin\*

*School of Chemistry and Chemical Engineering, Ningxia Key Laboratory of Solar Chemical Conversion Technology, Key Laboratory for Chemical Engineering and Technology, State Ethnic Affairs Commission, North Minzu University, Yinchuan 750021, P.R.China*

Corresponding author: [zl-jin@nwnu.edu.cn](mailto:zl-jin@nwnu.edu.cn) (Z. L. Jin)

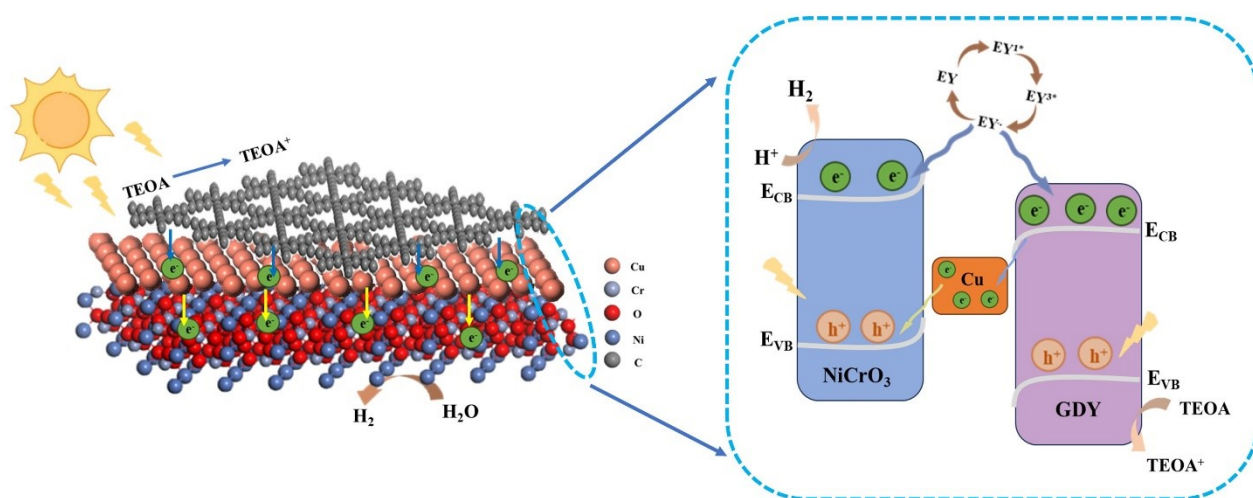

## **Section S1 Density Functional Theory**

The CASPTE module within the Material Studio software suite was used to perform theoretical calculations for all samples in the study. The GGA method using the PBE functional was utilized to investigate the subtle atomic interactions involved in the exchange functional process. During the stage of structural optimization, a plane-wave basis set with an energy threshold of 450 eV was exploited. Ionic relaxation was conducted with the convergence criteria set at a conventional energy of  $1 \times 10^{-5}$  electron volts and force of 0.01 eV Å. Additionally, to reduce interactions between adjacent layers, a vacuum layer of 15.0 Å was included.

Section S2: Characterizations

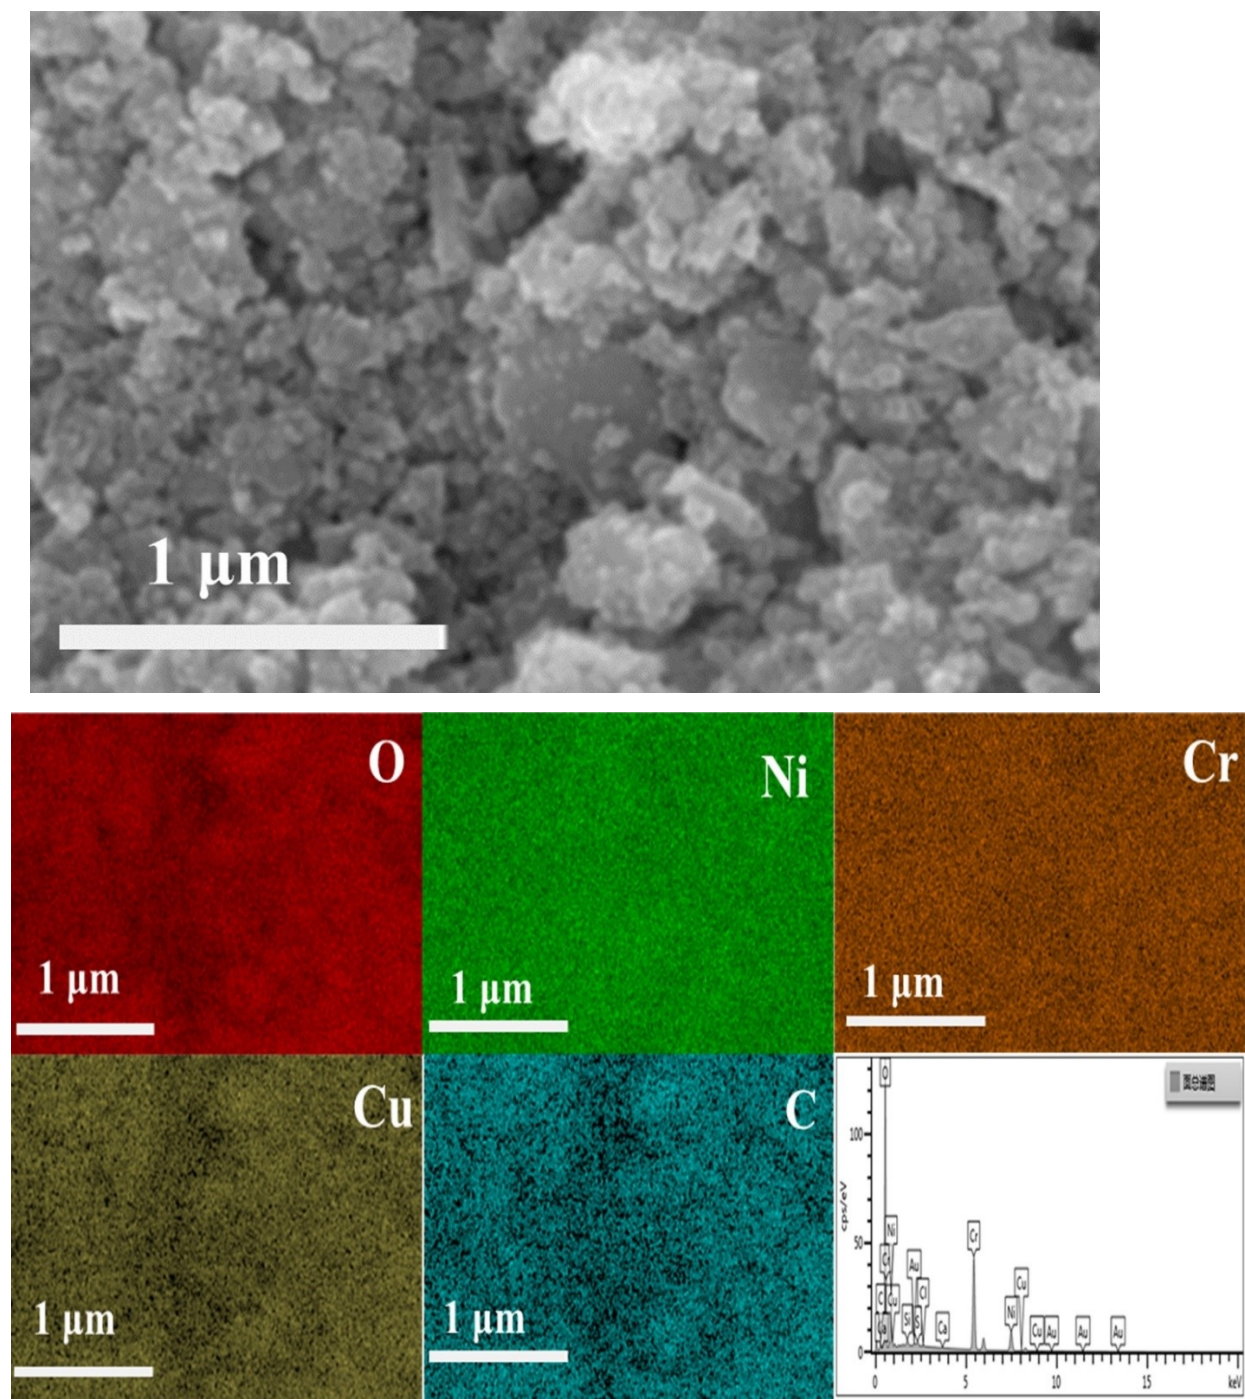

Fig. S1 (a) the EDS of GCNC20

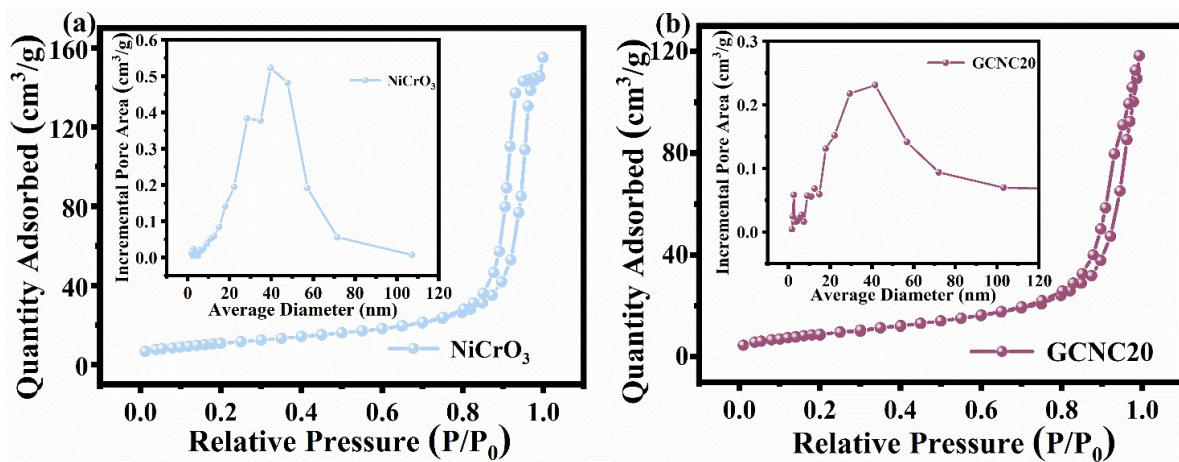

Fig. S2 (a, b) N<sub>2</sub> isothermal adsorption curves of NiCrO<sub>3</sub> and GCNC20.

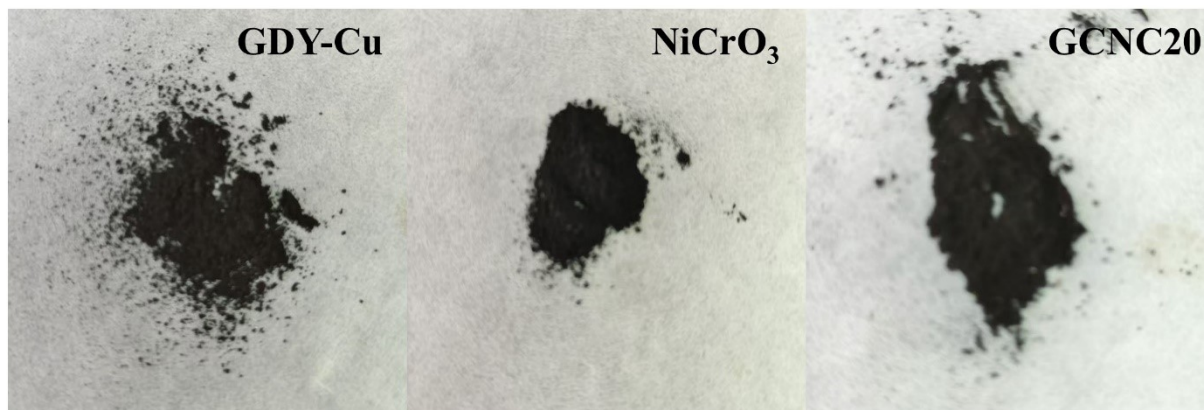

**Fig. S3** colors of GDY-Cu, NiCrO<sub>3</sub>, and GCNC20.

**Table S1** the  $S_{\text{BET}}$ , Pore volume and average pore size of NiCrO<sub>3</sub> and GCNC20.

| Samples            | $S_{\text{BET}}$ [m <sup>2</sup> g <sup>-1</sup> ] | Pore volume [cm <sup>3</sup> g <sup>-1</sup> ] | Average pore size [nm] |
|--------------------|----------------------------------------------------|------------------------------------------------|------------------------|
| NiCrO <sub>3</sub> | 39.28                                              | 0.23                                           | 23.24                  |
| GCNC20             | 33.68                                              | 0.18                                           | 21.73                  |

**Table S2** the content of each element in GCNC20

| element | wt %  |
|---------|-------|
| C       | 4.67  |
| O       | 35.89 |
| Cr      | 37.06 |
| Ni      | 20.64 |
| Cu      | 0.51  |
